# Supplementary material for: CCHamide-2 Is an Orexigenic Brain-Gut Peptide in Drosophila
Source: PubMed Central journal article supplement (PMC4500396; doi:10.1371/journal.pone.0133017), 2015-07-13
Supplement: pone.0133017.s001.pdf [file pone.0133017.s001.pdf]

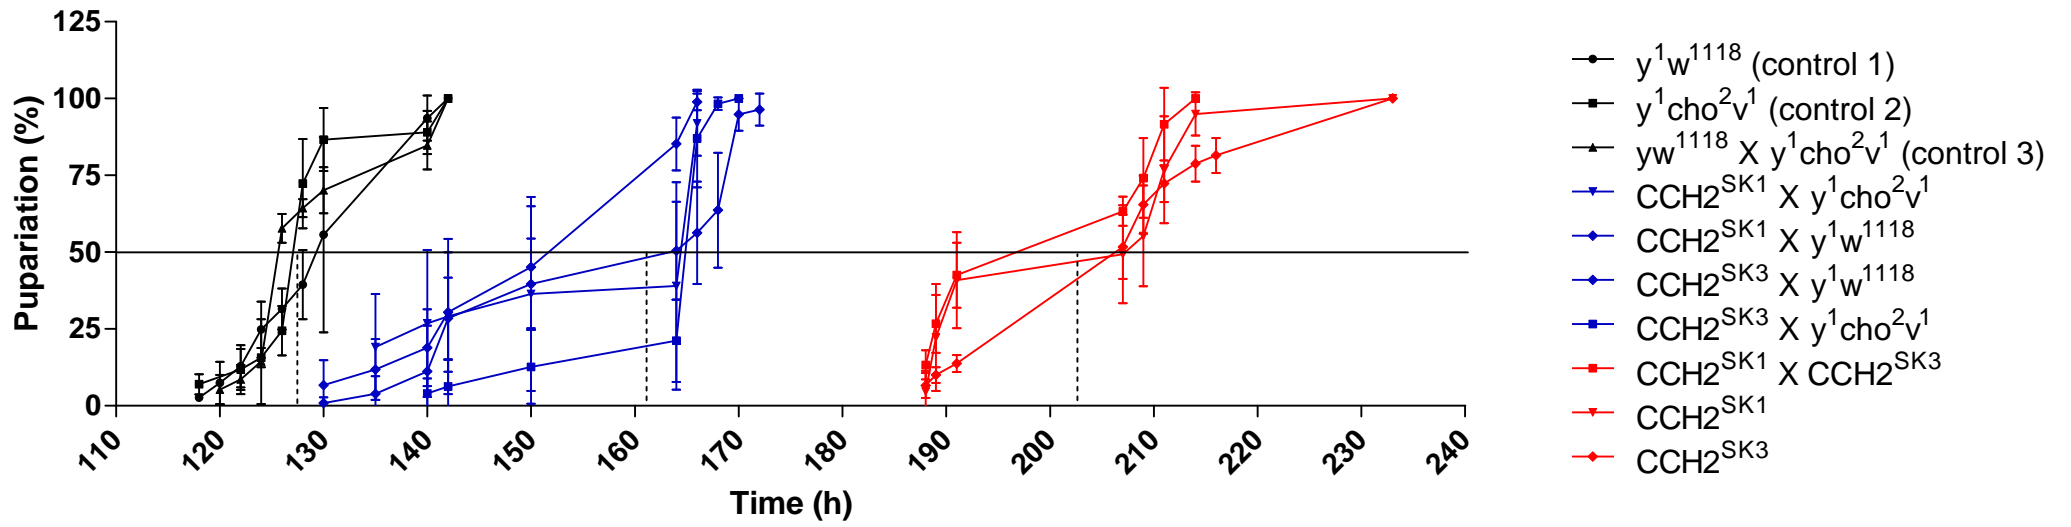

Fig. S1.
