# Supplementary material for: CCHamide-2 Is an Orexigenic Brain-Gut Peptide in Drosophila
Source: PubMed Central journal article supplement (PMC4500396; doi:10.1371/journal.pone.0133017), 2015-07-13
Supplement: pone.0133017.s003.pdf [file pone.0133017.s003.pdf]

**Table. S1. Primer list for qPCR**

| <b>Gene</b>            | <b>Sense</b>                   | <b>Antisense</b>                | <b>Reference</b> |
|------------------------|--------------------------------|---------------------------------|------------------|
| <i>RpLP0</i> (CG7490)  | 5'-ATCAAGGTTGTGGAAGTGTTCG-3'   | 5'-GCGGGTTGTTCTCCAGATGA-3'      |                  |
| <i>RpL32</i> (CG7939)  | 5'-TAAGCTGTCGCACAAATGGCG-3'    | 5'-AACGCGGTTCTGCATGAGCA-3'      |                  |
| <i>RpL11</i> (CG7726)  | 5'-CGATCCCTCCATCGGTATCT-3'     | 5'-AACCACTTCATGGCATCCTC-3'      |                  |
| <i>dilp2</i> (CG8167)  | 5'-CAGGAGTTCGAGGAGGAGGA-3'     | 5'-AAGATAGCTCCCAGGAAAGAGG-3'    |                  |
| <i>dlip3</i> (CG14167) | 5'-CAACGCAATGACCAAGAGAAC-3'    | 5'-GCATCTGAACCGAACTATCACTC-3'   |                  |
| <i>ccha2</i> (CG14375) | 5'-AAACAGCAACAGCAGCAAAC-3'     | 5'-AGGACCACGGTGCAGATAAC-3'      | [13]             |
| <i>ccha1</i> (CG14358) | 5'-AGTGCAGTTGGACTTTGGTAGTGT-3' | 5'-AGGGATGCTGTTTAGCATCTATGAC-3' | [21]             |
